# Supplementary material
Source: publisher figshare collection journal article supplement (https://rs.figshare.com/ndownloader/files/10290462)

**Figure S1.** Map of the study bioregions (modified from Olson et al. 2001 and Jetz & Fine 2012).

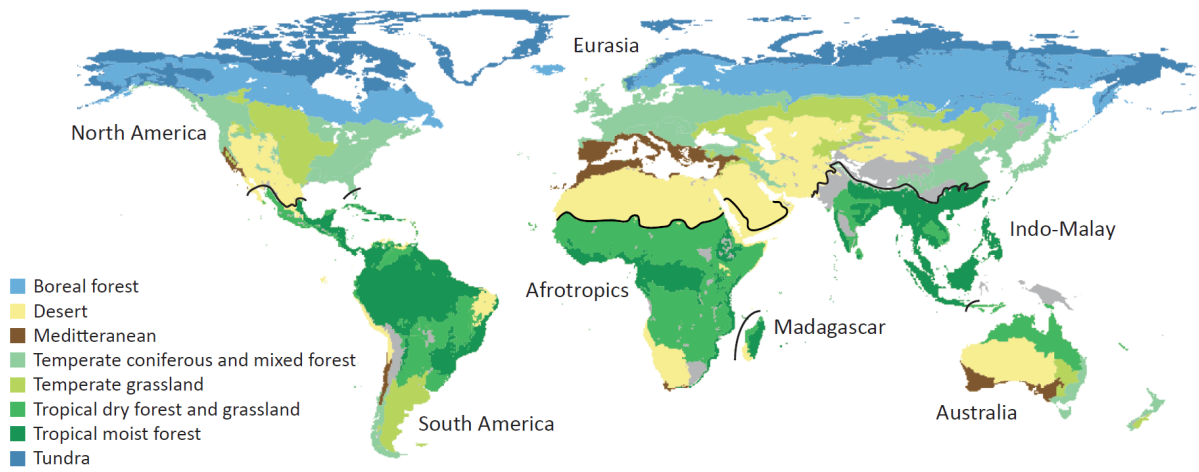

**Figure S2. Summary figure of the estimation of direct and indirect variables.**

For each bioregion (a) we computed three direct (b, c, d) and three indirect (e, f, g) variables.

*Maximum clade age* (b) is the age of the oldest clade in which all component species are found in the bioregion. *Speciation rate* (c) is the average speciation rate of the clades belonging to the focal bioregion. *Dispersal rate* (d) is the dispersal rate from any bioregion to the focal bioregion ( $d_B$ ). *Temperature* (e) is the mean temperature of the focal bioregion, *productivity* (f) is the total productivity of the focal bioregion, and *area through time* (g), our measure of climatic stability, is the integration of the focal bioregion area over the past 55 My (see methods for more details).

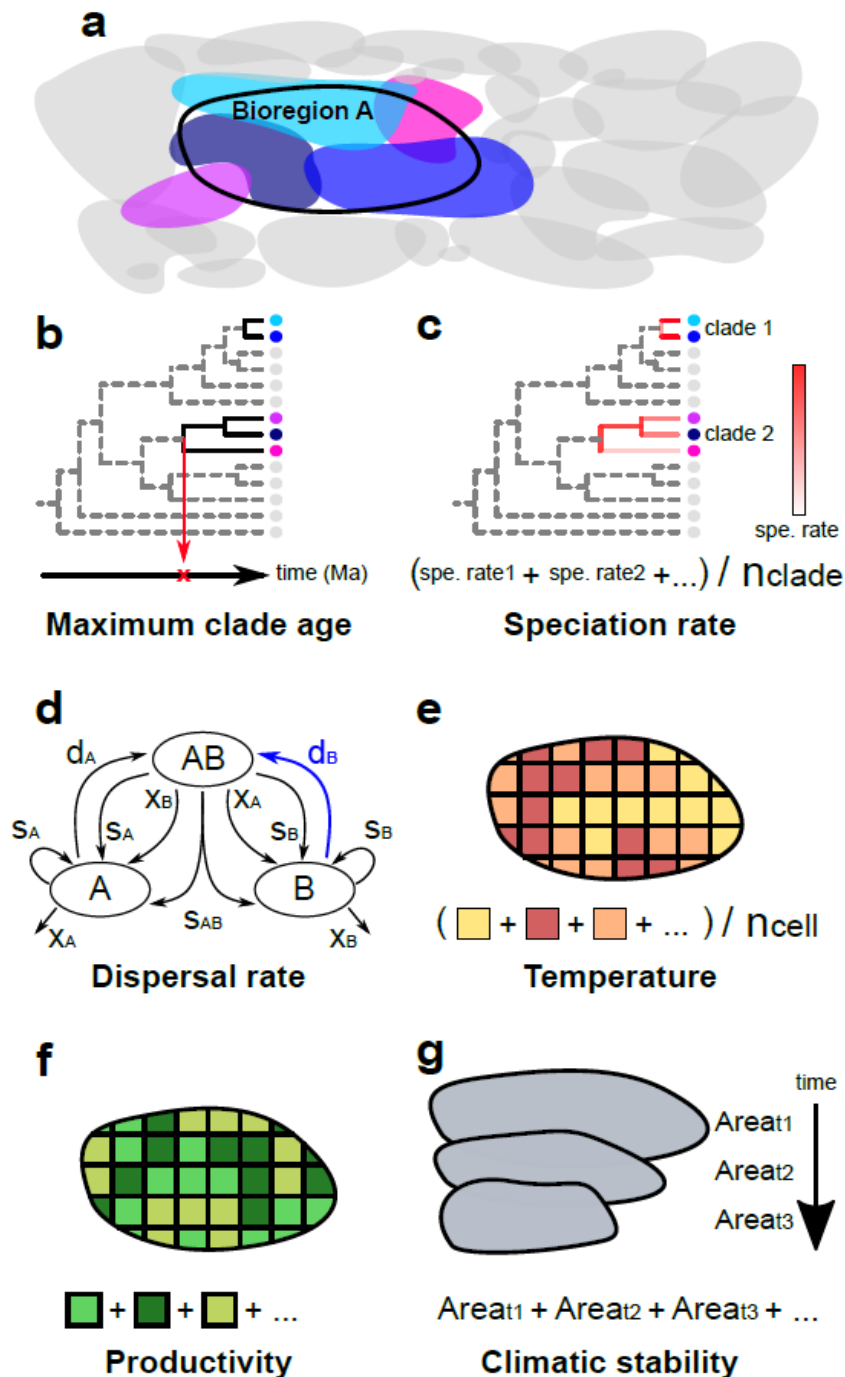

**Figure S3. Structural equation models depicting the associations of direct and indirect variables with species richness (full model, model 1).** *Maximum clade age, speciation rate, and dispersal rate* are the direct variables and *area through time, productivity, and temperature* the indirect variables, for tetrapods, amphibians, birds, mammals, and squamates. Bold path arrows represent significant (at  $P < 0.05$ ) associations. Numbers adjacent to arrows represent  $\beta$ -standardised regression coefficients.  $R^2$  value associated with each exogenous variable are in italics. For amphibians we also indicated  $\beta$ -standardised regression coefficients and  $R^2$  values after the removal of the outlier clade of Mediterranean Alytidae (12 species) if the result changed (value in second position). Max.: maximum.

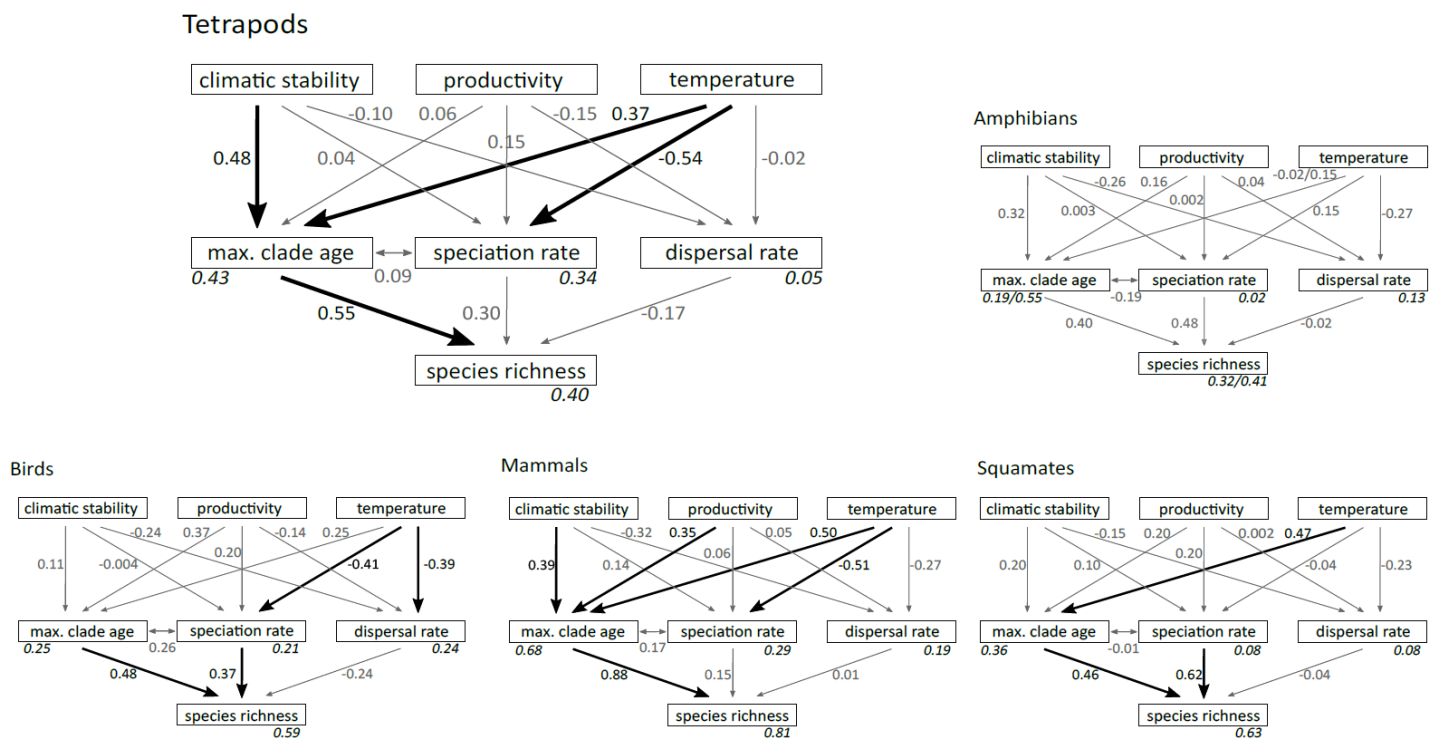

**Figure S4.** Structural equation models depicting the associations of direct (*maximum clade age*, *diversification rate*, and *dispersal*) and indirect (*area through time*, *productivity*, and *temperature*) variables with species richness (model 1) for tetrapods, amphibians, birds, mammals, and squamates. Bold path arrows represent significant (at  $P < 0.05$ ) associations. Numbers adjacent to arrows represent  $\beta$ -standardised regression coefficients.  $R^2$  value associated with each exogenous variable are in italics. For amphibians we also indicated  $\beta$ -standardised regression coefficients and  $R^2$  values after the removal of the outlier clade of Mediterranean Alytidae (12 species) if the result changed (value in second position). Div.: diversification, max.: maximum.

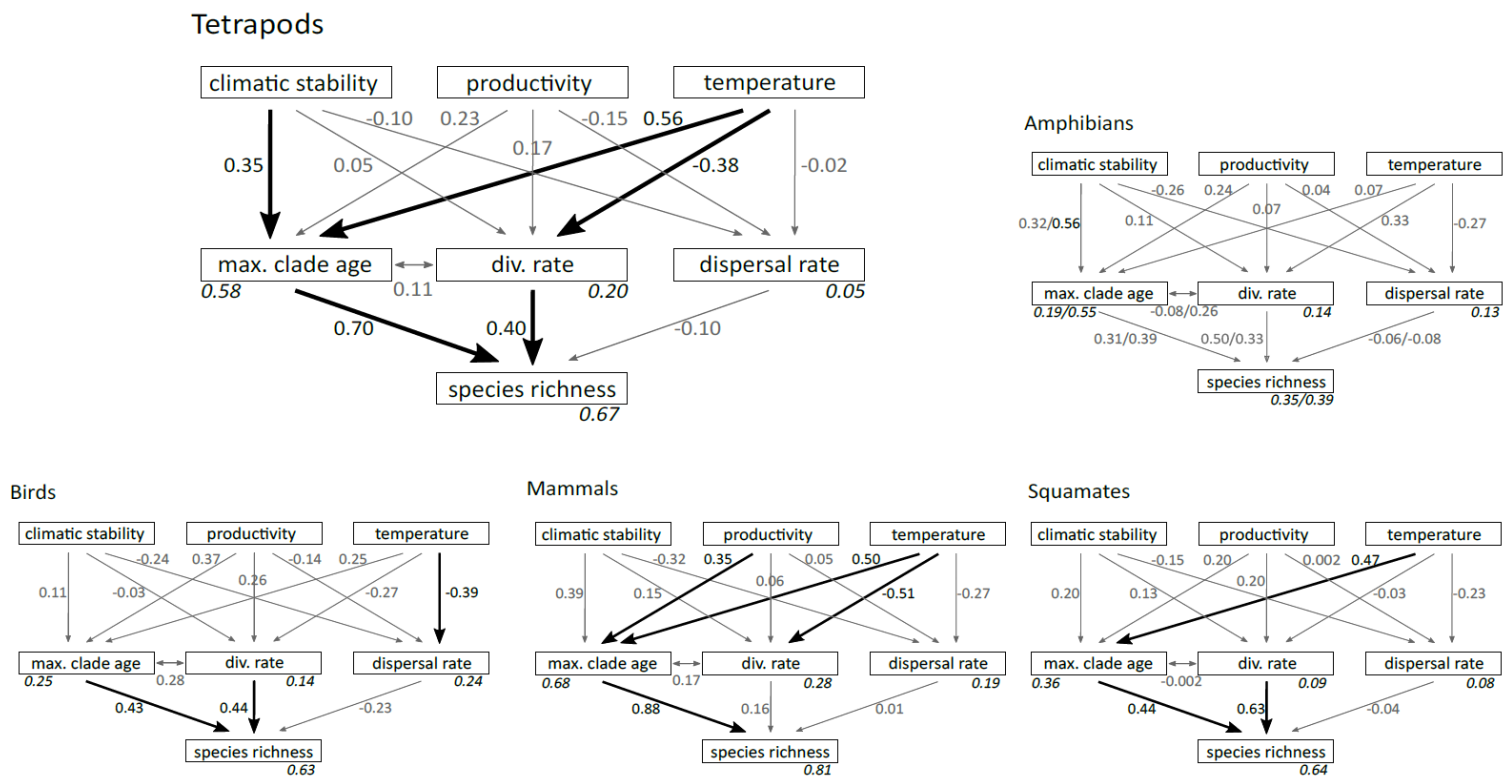

**Figure S5.** Path models depicting the associations of direct (*maximum clade age* and *diversification rate*) and indirect (*area through time*, *productivity*, and *temperature*) variables with species richness (model 2) for tetrapods, amphibians, birds, mammals, and squamates. Bold path arrows represent significant (at  $P < 0.05$ ) associations. Numbers adjacent to arrows represent  $\beta$ -standardised regression coefficients.  $R^2$  value associated with each exogenous variable are in italics. For amphibians we also indicated  $\beta$ -standardised regression coefficients and  $R^2$  values after the removal of the outlier clade of Mediterranean Alytidae (12 species) if the result changed (value in second position). Div.: diversification, max.: maximum.

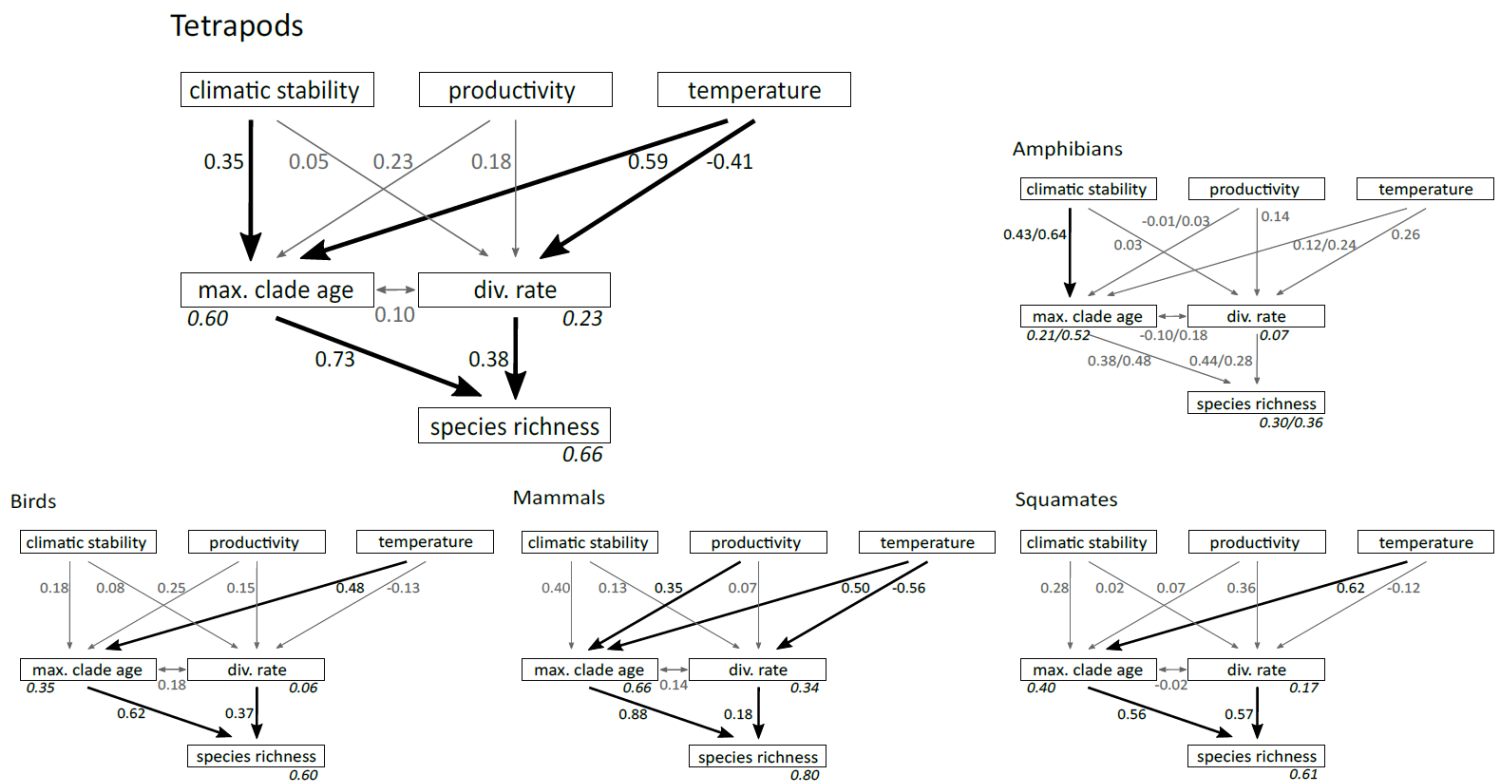

**Figure S6.** Distribution of the correlation coefficients between *maximum clade age* and *richness*. The correlation was calculated 1000 times over 100 regions for which X clades were sampled from a variable birth-death simulated timetree (see methods). The black line represents the 0.95 upper limit of the distribution and the red lines the estimated correlation coefficients of amphibians (a; without the outlier clade), birds (c), mammals (e), squamates (b), and tetrapods (d).

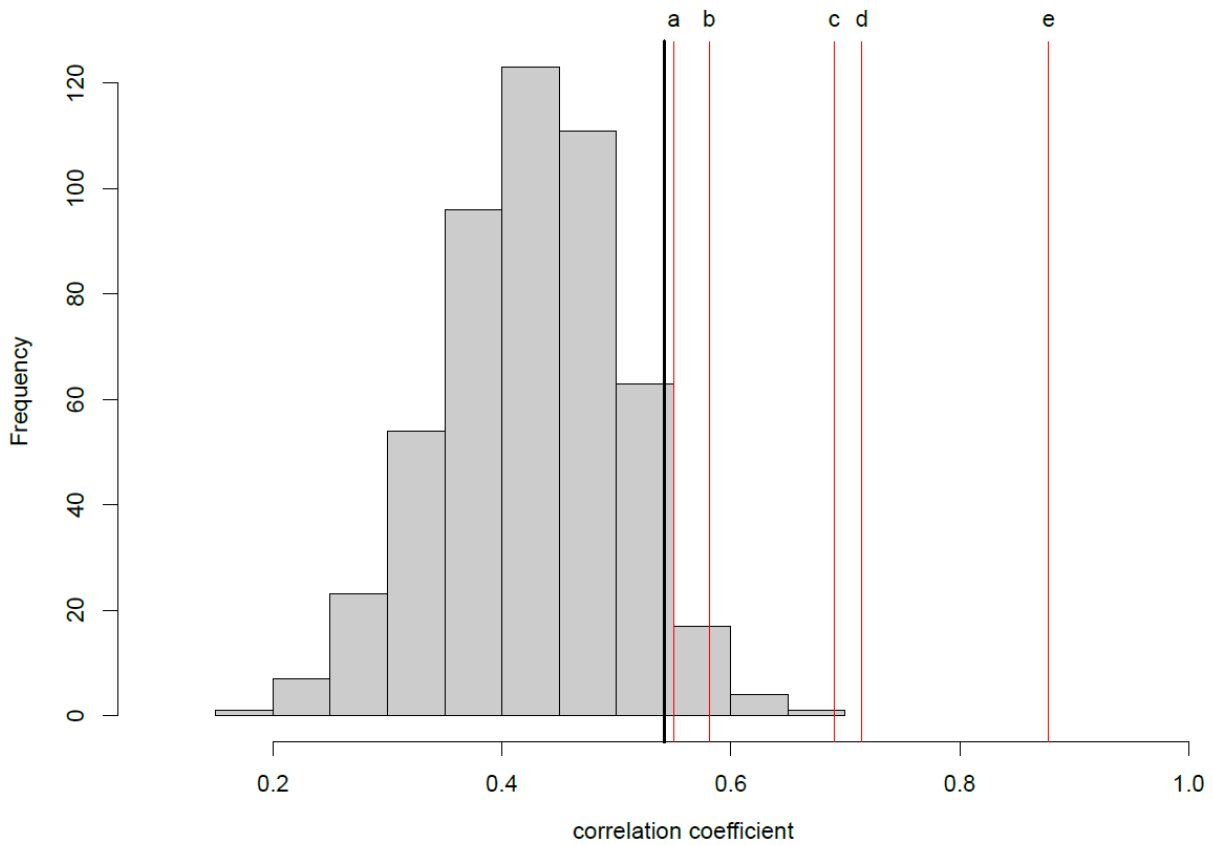

Supplement: Supplementary file 1 [file 10290462]
